# Supplementary material
Source: PubMed Central journal article supplement (PMC9780190)
Supplement: NIHMS1848945-supplement-Supplemental_Publication_Material.pdf [file NIHMS1848945-supplement-Supplemental_Publication_Material.pdf]

## SUPPLEMENTAL MATERIALS

### **Blood Pressure Responses During Exercise: Physiological Correlates and Clinical Implications**

Matthew Naylor, MD, MPH<sup>1,2,3\*</sup>, Priya Gajjar, MS<sup>1</sup>; Venkatesh L. Murthy, MD, PhD<sup>4,5</sup>; Patricia Miller, MS<sup>6</sup>; Raghava S. Velagaleti, MD, MPH<sup>3,7</sup>; Martin G. Larson, SD<sup>3,6</sup>; Ramachandran S. Vasan, MD<sup>1,2,3,8,9</sup>; Gregory D. Lewis, MD<sup>10\*</sup>; Gary F. Mitchell, MD<sup>11\*</sup>; Ravi V. Shah, MD<sup>12\*</sup>

(1) Cardiovascular Medicine Section, Department of Medicine, Boston University School of Medicine, Boston, MA; (2) Preventive Medicine and Epidemiology Section, Department of Medicine, Boston University School of Medicine, Boston, MA; (3) Boston University's and National Heart, Lung, and Blood Institute's Framingham Heart Study, Framingham, MA; (4) Division of Cardiovascular Medicine, Department of Medicine, University of Michigan, Ann Arbor; (5) Frankel Cardiovascular Center, University of Michigan, Ann Arbor; (6) Department of Biostatistics, Boston University School of Public Health, Boston, MA; (7) Cardiology Section, Department of Medicine, Boston VA Healthcare System, West Roxbury, Massachusetts; (8) University of Texas School of Public Health San Antonio, and Departments of Medicine and Population Health Sciences, University of Texas Health Science Center, San Antonio, TX; (9) Department of Epidemiology, Boston University School of Public Health, and the Center for Computing and Data Sciences, Boston University, Boston, MA; (10) Cardiology Division and Pulmonary Critical Care Unit, Department of Medicine, Massachusetts General Hospital, Harvard Medical School, Boston, MA; (11) Cardiovascular Engineering, Inc., Norwood, MA; (12) Vanderbilt Translational and Clinical Research Center, Cardiology Division, Vanderbilt University Medical Center, Nashville, TN

#### **Contents:**

Supplemental Methods

Tables S1-S4

## Supplemental Methods

Equations used for predicted peak oxygen uptake ( $\text{VO}_2$ ) as defined by the Wasserman-Hansen equations are reproduced below<sup>20</sup>.

### Men

$$\text{Ideal weight (kg)} = 0.79 \times \text{Height (cm)} - 60.7$$

If actual weight equals or exceeds ideal weight:

$$\text{Peak } \text{VO}_2 = 0.0337 \times \text{Height} - 0.000165 \times \text{Age} \times \text{Height} - 1.963 + 0.006 \times \text{Weight (actual - ideal)}$$

If actual weight is less than ideal weight:

$$\text{Peak } \text{VO}_2 = 0.0337 \times \text{Height} - 0.000165 \times \text{Age} \times \text{Height} - 1.963 + 0.014 \times \text{Weight (actual - ideal)}$$

### Women

$$\text{Ideal weight (kg)} = 0.65 \times \text{Height (cm)} - 42.8$$

$$\text{Peak } \text{VO}_2 = 0.001 \times \text{Height} \times (14.783 - 0.11 \times \text{Age}) + 0.006 \times \text{Weight (actual - ideal)}$$

**Table S1A. Characteristics by categories of peak O<sub>2</sub> pulse in women and men with CFPWV values below the median**

| Variable                                | Women (CFPWV <7.2 m/s)                               |                                                      |         | Men (CFPWV <7.9 m/s)                                  |                                                       |         |
|-----------------------------------------|------------------------------------------------------|------------------------------------------------------|---------|-------------------------------------------------------|-------------------------------------------------------|---------|
|                                         | Peak O <sub>2</sub> pulse<br><9.5 ml/beat<br>(N=349) | Peak O <sub>2</sub> pulse<br>≥9.5 ml/beat<br>(N=397) | P-value | Peak O <sub>2</sub> pulse<br><15.0 ml/beat<br>(N=286) | Peak O <sub>2</sub> pulse<br>≥15.0 ml/beat<br>(N=393) | P-value |
| Age, years                              | 51 ± 8                                               | 48 ± 8                                               | <0.001  | 51 ± 9                                                | 49 ± 8                                                | 0.002   |
| Body mass index, kg/m <sup>2</sup>      | 25.0 ± 4.5                                           | 27.2 ± 5.8                                           | <0.001  | 27.1 ± 4.1                                            | 28.8 ± 4.5                                            | <0.001  |
| Total Cholesterol, (mg/dl)              | 195.0 ± 34.0                                         | 185.4 ± 32.6                                         | <0.001  | 184.5 ± 34.5                                          | 185.3 ± 34.0                                          | 0.76    |
| HDL Cholesterol, (mg/dl)                | 69.4 ± 18.2                                          | 68.6 ± 17.3                                          | 0.55    | 51.5 ± 14.9                                           | 52.0 ± 14.6                                           | 0.68    |
| Treated for Diabetes, N (%)             | 3 (0.9)                                              | 8 (2.0)                                              | 0.32    | 7 (2.4)                                               | 3 (0.8)                                               | 0.14    |
| Current Smoker, N (%)                   | 24 (6.9)                                             | 28 (7.1)                                             | 1.00    | 23 (8.0)                                              | 16 (4.1)                                              | 0.04    |
| Prevalent cardiovascular disease, N (%) | 8 (2.3)                                              | 8 (2.0)                                              | 0.99    | 7 (2.4)                                               | 10 (2.5)                                              | 1.00    |
| Hypertension treatment, N (%)           | 25 (7.2)                                             | 38 (9.6)                                             | 0.29    | 46 (16.1)                                             | 45 (11.5)                                             | 0.10    |
| Resting Heart Rate, beats/min           | 75 ± 12                                              | 70 ± 11                                              | <0.001  | 70 ± 11                                               | 65 ± 10                                               | <0.001  |
| Physical Activity Index                 | 32.5 ± 3.9                                           | 33.8 ± 4.0                                           | <0.001  | 35.3 ± 7.1                                            | 34.9 ± 6.4                                            | 0.53    |
| Resting systolic blood pressure, mm Hg  | 109 ± 11                                             | 110 ± 11                                             | 0.30    | 117 ± 11                                              | 117 ± 11                                              | 0.31    |
| Peak Systolic blood pressure mm Hg      | 160 ± 20                                             | 169 ± 21                                             | <0.001  | 182 ± 22                                              | 191 ± 22                                              | <0.001  |
| CFPWV, m/s                              | 6.4 ± 0.5                                            | 6.3 ± 0.6                                            | 0.06    | 7.0 ± 0.6                                             | 6.9 ± 0.6                                             | 0.01    |
| Peak O <sub>2</sub> pulse, mL/beat      | 8.1 ± 1.0                                            | 11.6 ± 1.6                                           | <0.001  | 13.0 ± 1.6                                            | 18.1 ± 2.3                                            | <0.001  |
| Peak VO <sub>2</sub> , ml/kg/min        | 19.8 ± 4.1                                           | 25.6 ± 6.4                                           | <0.001  | 25.1 ± 4.7                                            | 31.5 ± 6.8                                            | <0.001  |
| Peak workload, watts                    | 120 ± 20                                             | 168 ± 34                                             | <0.001  | 197 ± 35                                              | 261 ± 43                                              | <0.001  |
| Peak RER                                | 1.23 ± 0.09                                          | 1.20 ± 0.08                                          | <0.001  | 1.28 ± 0.10                                           | 1.24 ± 0.08                                           | <0.001  |

Median CFPWV was 7.2 m/s in women and 7.9 m/s in men

Median peak O<sub>2</sub> pulse was 9.5 ml/beat in women and 15.0 ml/beat in men

**Table S1B. Characteristics by categories of peak O<sub>2</sub> pulse in women and men with CFPWV values above the median**

| Variable                                | Women (CFPWV ≥7.2 m/s)                               |                                                      |         | Men (CFPWV ≥7.9 m/s)                                  |                                                       |         |
|-----------------------------------------|------------------------------------------------------|------------------------------------------------------|---------|-------------------------------------------------------|-------------------------------------------------------|---------|
|                                         | Peak O <sub>2</sub> pulse<br><9.5 ml/beat<br>(N=397) | Peak O <sub>2</sub> pulse<br>≥9.5 ml/beat<br>(N=350) | P-value | Peak O <sub>2</sub> pulse<br><15.0 ml/beat<br>(N=396) | Peak O <sub>2</sub> pulse<br>≥15.0 ml/beat<br>(N=290) | P-value |
| Age, years                              | 59 ± 7                                               | 55 ± 7                                               | <0.001  | 59 ± 9                                                | 57 ± 7                                                | 0.001   |
| Body mass index, kg/m <sup>2</sup>      | 26.1 ± 4.8                                           | 30.4 ± 6.0                                           | <0.001  | 29.2 ± 4.4                                            | 31.3 ± 5.0                                            | <0.001  |
| Total Cholesterol, (mg/dl)              | 204.9 ± 35.9                                         | 199.6 ± 35.9                                         | 0.047   | 183.5 ± 38.9                                          | 184.5 ± 35.7                                          | 0.73    |
| HDL Cholesterol, (mg/dl)                | 70.1 ± 21.1                                          | 64.5 ± 19.5                                          | <0.001  | 50.8 ± 16.0                                           | 48.4 ± 13.3                                           | 0.03    |
| Treated for Diabetes, N (%)             | 19 (4.8)                                             | 25 (7.1)                                             | 0.23    | 46 (11.6)                                             | 34 (11.7)                                             | 1.00    |
| Current Smoker, N (%)                   | 23 (5.8)                                             | 9 (2.6)                                              | 0.047   | 28 (7.1)                                              | 13 (4.5)                                              | 0.21    |
| Prevalent cardiovascular disease, N (%) | 7 (1.8)                                              | 14 (4.0)                                             | 0.10    | 38 (9.6)                                              | 12 (4.1)                                              | 0.01    |
| Hypertension treatment, N (%)           | 102 (25.7)                                           | 91 (26.0)                                            | 0.99    | 152 (38.4)                                            | 100 (34.5)                                            | 0.33    |
| Resting Heart Rate, beats/min           | 77 ± 12                                              | 74 ± 11                                              | <0.001  | 74 ± 12                                               | 69 ± 11                                               | <0.001  |
| Physical Activity Index                 | 32.8 ± 4.2                                           | 33.0 ± 4.2                                           | 0.44    | 35.2 ± 6.6                                            | 35.2 ± 6.4                                            | 0.98    |
| Resting systolic blood pressure, mm Hg  | 123 ± 15                                             | 122 ± 13                                             | 0.36    | 129 ± 13                                              | 127 ± 12                                              | 0.07    |
| Peak Systolic blood pressure mm Hg      | 175 ± 23                                             | 184 ± 22                                             | <0.001  | 193 ± 24                                              | 197 ± 23                                              | 0.017   |
| CFPWV, m/s                              | 8.8 ± 1.9                                            | 8.4 ± 1.4                                            | 0.006   | 9.9 ± 2.2                                             | 9.4 ± 1.6                                             | <0.001  |
| Peak O <sub>2</sub> pulse, mL/beat      | 7.9 ± 1.0                                            | 11.1 ± 1.4                                           | <0.001  | 12.7 ± 1.7                                            | 17.5 ± 2.1                                            | <0.001  |
| Peak VO <sub>2</sub> , ml/kg/min        | 17.9 ± 3.7                                           | 20.7 ± 5.6                                           | <0.001  | 21.5 ± 4.4                                            | 25.9 ± 6.1                                            | <0.001  |
| Peak workload, watts                    | 110 ± 19                                             | 144 ± 28                                             | <0.001  | 172 ± 39                                              | 226 ± 43                                              | <0.001  |
| Peak RER                                | 1.23 ± 0.09                                          | 1.20 ± 0.08                                          | <0.001  | 1.24 ± 0.10                                           | 1.21 ± 0.08                                           | <0.001  |

Median CFPWV was 7.2 m/s in women and 7.9 m/s in men.

Median peak O<sub>2</sub> pulse was 9.5 ml/beat in women and 15.0 ml/beat in men

**Table S2. Multivariable models for prediction of peak SBP**

| Variable               | All participants (N=2858) |         | Men (N=1365) |         | Women (N=1493) |         |
|------------------------|---------------------------|---------|--------------|---------|----------------|---------|
|                        | Est. beta±SE              | P-value | Est. beta±SE | P-value | Est. beta±SE   | P-value |
| Age                    | -0.20±0.05                | <0.0001 | -0.39±0.07   | <0.0001 | 0.00±0.06      | 1.00    |
| Sex                    | 1.96±1.06                 | 0.06    | --           | --      | --             | --      |
| Rest SBP               | 0.81±0.02                 | <0.0001 | 0.80±0.04    | <0.0001 | 0.82±0.03      | <0.0001 |
| Hypertension treatment | -3.76±0.91                | <0.0001 | -3.23±1.29   | 0.01    | -3.82±1.28     | 0.003   |
| Transformed CFPWV      | 0.11±0.02                 | <0.0001 | 0.08±0.03    | 0.007   | 0.14±0.02      | <0.0001 |
| Log(peak O2 pulse)     | 21.1±1.6                  | <0.0001 | 19.0±2.6     | <0.0001 | 22.5±2.1       | <0.0001 |

Model adjusted R-squared values are 0.47 in all participants, 0.31 in men, and 0.45 in women.

Regression coefficients represent the change in peak SBP for a 1-unit higher value of each independent variable.

**Table S3. Cross-sectional associations of a 1-SD higher blood pressure measure with a 1-SD higher value for arterial stiffness measures with additional covariate adjustment**

| BP measure      | Arterial stiffness measures         | Women (N=1492)                                     |                | Men (N=1365)                                       |                |
|-----------------|-------------------------------------|----------------------------------------------------|----------------|----------------------------------------------------|----------------|
|                 |                                     | <i>Est. <math>\beta</math> <math>\pm</math> SE</i> | <b>P-value</b> | <i>Est. <math>\beta</math> <math>\pm</math> SE</i> | <b>P-value</b> |
| Freewheel SBP   | Carotid-femoral pulse wave velocity | 0.06 $\pm$ 0.02                                    | 0.0002         | 0.06 $\pm$ 0.02                                    | 0.0007         |
| Freewheel SBP   | Peak O <sub>2</sub> pulse           | -0.04 $\pm$ 0.01                                   | 0.008          | -0.05 $\pm$ 0.01                                   | 0.002          |
| Freewheel SBP   | Augmentation Index                  | 0.01 $\pm$ 0.01                                    | 0.26           | 0.02 $\pm$ 0.01                                    | 0.17           |
| Freewheel SBP   | Characteristic Impedance            | 0.06 $\pm$ 0.01                                    | <0.0001        | 0.04 $\pm$ 0.01                                    | 0.008          |
| Freewheel SBP   | Forward wave amplitude              | 0.07 $\pm$ 0.01                                    | <0.0001        | 0.05 $\pm$ 0.01                                    | 0.0008         |
| SBP at 75 watts | Carotid-femoral pulse wave velocity | 0.12 $\pm$ 0.02                                    | <0.0001        | 0.12 $\pm$ 0.02                                    | <0.0001        |
| SBP at 75 watts | Peak O <sub>2</sub> pulse           | -0.22 $\pm$ 0.02                                   | <0.0001        | -0.20 $\pm$ 0.02                                   | <0.0001        |
| SBP at 75 watts | Augmentation Index                  | 0.03 $\pm$ 0.02                                    | 0.08           | 0.0 $\pm$ 0.02                                     | 0.82           |
| SBP at 75 watts | Characteristic Impedance            | 0.12 $\pm$ 0.02                                    | <0.0001        | 0.11 $\pm$ 0.02                                    | <0.0001        |
| SBP at 75 watts | Forward wave amplitude              | 0.11 $\pm$ 0.02                                    | <0.0001        | 0.10 $\pm$ 0.02                                    | <0.0001        |
| Peak SBP        | Carotid-femoral pulse wave velocity | 0.11 $\pm$ 0.03                                    | <0.0001        | 0.03 $\pm$ 0.03                                    | 0.36           |
| Peak SBP        | Peak O <sub>2</sub> pulse           | 0.16 $\pm$ 0.02                                    | <0.0001        | 0.13 $\pm$ 0.02                                    | <0.0001        |
| Peak SBP        | Augmentation Index                  | 0.01 $\pm$ 0.02                                    | 0.51           | 0.00 $\pm$ 0.02                                    | 0.97           |
| Peak SBP        | Characteristic Impedance            | 0.04 $\pm$ 0.02                                    | 0.10           | 0.03 $\pm$ 0.02                                    | 0.16           |
| Peak SBP        | Forward wave amplitude              | 0.13 $\pm$ 0.02                                    | <0.0001        | 0.08 $\pm$ 0.02                                    | 0.0007         |
| Peak DBP        | Carotid-femoral pulse wave velocity | 0.12 $\pm$ 0.03                                    | <0.0001        | 0.10 $\pm$ 0.03                                    | 0.0001         |
| Peak DBP        | Peak O <sub>2</sub> pulse           | -0.12 $\pm$ 0.02                                   | <0.0001        | -0.17 $\pm$ 0.02                                   | <0.0001        |
| Peak DBP        | Augmentation Index                  | 0.05 $\pm$ 0.02                                    | 0.01           | 0.07 $\pm$ 0.02                                    | 0.002          |
| Peak DBP        | Characteristic Impedance            | 0.02 $\pm$ 0.02                                    | 0.38           | -0.01 $\pm$ 0.02                                   | 0.79           |
| Peak DBP        | Forward wave amplitude              | 0.05 $\pm$ 0.02                                    | 0.02           | 0.0 $\pm$ 0.02                                     | 0.995          |
| SBP/W slope     | Carotid-femoral pulse wave velocity | 0.20 $\pm$ 0.03                                    | <0.0001        | 0.15 $\pm$ 0.03                                    | <0.0001        |
| SBP/W slope     | Peak O <sub>2</sub> pulse           | -0.31 $\pm$ 0.02                                   | <0.0001        | -0.37 $\pm$ 0.03                                   | <0.0001        |
| SBP/W slope     | Augmentation Index                  | 0.05 $\pm$ 0.03                                    | 0.048          | 0.03 $\pm$ 0.03                                    | 0.24           |
| SBP/W slope     | Characteristic Impedance            | 0.17 $\pm$ 0.03                                    | <0.0001        | 0.19 $\pm$ 0.03                                    | <0.0001        |
| SBP/W slope     | Forward wave amplitude              | 0.19 $\pm$ 0.03                                    | <0.0001        | 0.13 $\pm$ 0.03                                    | <0.0001        |

All variables shown were mean-centered and standardized for regression. Regression coefficients represent the change in BP measures (dependent variables) for a 1-SD higher value of the vascular stiffness measures or peak O<sub>2</sub> pulse. Models were adjusted for age, hypertension treatment, resting SBP, BMI, smoking, and menopause (women) and separate models were constructed for men and women. In models with peak DBP as the dependent variable, we substituted resting DBP for resting SBP as a covariate. 897 (60%) of women were post-menopausal. A Bonferroni-adjusted P-value threshold of 0.01 was used to determine statistical significance.

**Table S4. Cross-sectional associations of a 1-SD higher blood pressure measure with a 1-SD higher value for vascular stiffness measures in the whole sample and in the subsample free of resting hypertension**

| Vascular stiffness measures | Women                                              |         |                                                    |         | Men                                                |         |                                                    |         |
|-----------------------------|----------------------------------------------------|---------|----------------------------------------------------|---------|----------------------------------------------------|---------|----------------------------------------------------|---------|
|                             | All Women (N=1492)                                 |         | Non-hypertensives (N=953)                          |         | All Men (N=1365)                                   |         | Non-hypertensives (N=556)                          |         |
|                             | <i>Est. <math>\beta</math> <math>\pm</math> SE</i> | p-value |
| Freewheel SBP               |                                                    |         |                                                    |         |                                                    |         |                                                    |         |
| CFPWV                       | 0.07 $\pm$ 0.02                                    | <0.0001 | 0.05 $\pm$ 0.02                                    | 0.02    | 0.08 $\pm$ 0.02                                    | <0.0001 | 0.06 $\pm$ 0.03                                    | 0.06    |
| Peak O <sub>2</sub> pulse   | -0.01 $\pm$ 0.01                                   | 0.27    | -0.01 $\pm$ 0.02                                   | 0.47    | -0.02 $\pm$ 0.01                                   | 0.10    | -0.04 $\pm$ 0.03                                   | 0.12    |
| Augmentation Index          | 0.01 $\pm$ 0.01                                    | 0.50    | 0.01 $\pm$ 0.02                                    | 0.51    | 0.01 $\pm$ 0.01                                    | 0.33    | 0.02 $\pm$ 0.03                                    | 0.41    |
| Characteristic Impedance    | 0.04 $\pm$ 0.01                                    | 0.0009  | 0.03 $\pm$ 0.02                                    | 0.06    | 0.03 $\pm$ 0.01                                    | 0.03    | 0.01 $\pm$ 0.03                                    | 0.67    |
| Forward wave amplitude      | 0.07 $\pm$ 0.01                                    | <0.0001 | 0.08 $\pm$ 0.02                                    | 0.0001  | 0.05 $\pm$ 0.02                                    | 0.001   | 0.04 $\pm$ 0.03                                    | 0.11    |
| SBP at 75 watts             |                                                    |         |                                                    |         |                                                    |         |                                                    |         |
| CFPWV                       | 0.14 $\pm$ 0.02                                    | <0.0001 | 0.11 $\pm$ 0.03                                    | 0.0001  | 0.14 $\pm$ 0.02                                    | <0.0001 | 0.12 $\pm$ 0.04                                    | 0.003   |
| Peak O <sub>2</sub> pulse   | -0.16 $\pm$ 0.02                                   | <0.0001 | -0.20 $\pm$ 0.02                                   | <0.0001 | -0.17 $\pm$ 0.02                                   | <0.0001 | -0.19 $\pm$ 0.03                                   | <0.0001 |
| Augmentation Index          | 0.02 $\pm$ 0.02                                    | 0.29    | 0.02 $\pm$ 0.02                                    | 0.52    | 0.00 $\pm$ 0.02                                    | 0.97    | 0.02 $\pm$ 0.03                                    | 0.46    |
| Characteristic Impedance    | 0.09 $\pm$ 0.02                                    | <0.0001 | 0.10 $\pm$ 0.02                                    | <0.0001 | 0.10 $\pm$ 0.02                                    | <0.0001 | 0.12 $\pm$ 0.03                                    | 0.0003  |
| Forward wave amplitude      | 0.11 $\pm$ 0.02                                    | <0.0001 | 0.12 $\pm$ 0.03                                    | <0.0001 | 0.10 $\pm$ 0.02                                    | <0.0001 | 0.10 $\pm$ 0.03                                    | 0.002   |
| Peak SBP                    |                                                    |         |                                                    |         |                                                    |         |                                                    |         |
| CFPWV                       | 0.13 $\pm$ 0.03                                    | <0.0001 | 0.09 $\pm$ 0.03                                    | 0.005   | 0.05 $\pm$ 0.03                                    | 0.09    | -0.04 $\pm$ 0.05                                   | 0.40    |
| Peak O <sub>2</sub> pulse   | 0.20 $\pm$ 0.02                                    | <0.0001 | 0.25 $\pm$ 0.03                                    | <0.0001 | 0.16 $\pm$ 0.02                                    | <0.0001 | 0.23 $\pm$ 0.04                                    | <0.0001 |
| Augmentation Index          | -0.01 $\pm$ 0.02                                   | 0.78    | -0.03 $\pm$ 0.03                                   | 0.27    | -0.02 $\pm$ 0.02                                   | 0.41    | 0.00 $\pm$ 0.04                                    | 0.99    |
| Characteristic Impedance    | 0.00 $\pm$ 0.02                                    | 0.92    | -0.01 $\pm$ 0.03                                   | 0.77    | 0.02 $\pm$ 0.02                                    | 0.47    | -0.04 $\pm$ 0.04                                   | 0.27    |
| Forward wave amplitude      | 0.12 $\pm$ 0.02                                    | <0.0001 | 0.15 $\pm$ 0.03                                    | <0.0001 | 0.08 $\pm$ 0.02                                    | 0.002   | 0.07 $\pm$ 0.04                                    | 0.07    |
| Peak DBP                    |                                                    |         |                                                    |         |                                                    |         |                                                    |         |
| CFPWV                       | 0.13 $\pm$ 0.03                                    | <0.0001 | 0.10 $\pm$ 0.03                                    | 0.002   | 0.12 $\pm$ 0.03                                    | <0.0001 | 0.10 $\pm$ 0.04                                    | 0.02    |
| Peak O <sub>2</sub> pulse   | -0.09 $\pm$ 0.02                                   | <0.0001 | -0.11 $\pm$ 0.03                                   | 0.0001  | -0.13 $\pm$ 0.02                                   | <0.0001 | -0.14 $\pm$ 0.04                                   | 0.0002  |
| Augmentation Index          | 0.05 $\pm$ 0.02                                    | 0.01    | 0.04 $\pm$ 0.03                                    | 0.14    | 0.06 $\pm$ 0.02                                    | 0.006   | 0.06 $\pm$ 0.04                                    | 0.09    |
| Characteristic Impedance    | 0.01 $\pm$ 0.02                                    | 0.59    | 0.00 $\pm$ 0.03                                    | 0.95    | -0.01 $\pm$ 0.02                                   | 0.64    | 0.05 $\pm$ 0.04                                    | 0.19    |
| Forward wave amplitude      | 0.05 $\pm$ 0.02                                    | 0.01    | 0.03 $\pm$ 0.03                                    | 0.22    | 0 $\pm$ 0.02                                       | 0.94    | 0.04 $\pm$ 0.04                                    | 0.25    |
| SBP/W slope                 |                                                    |         |                                                    |         |                                                    |         |                                                    |         |
| CFPWV                       | 0.23 $\pm$ 0.03                                    | <0.0001 | 0.17 $\pm$ 0.04                                    | <0.0001 | 0.19 $\pm$ 0.03                                    | <0.0001 | 0.08 $\pm$ 0.05                                    | 0.12    |
| Peak O <sub>2</sub> pulse   | -0.22 $\pm$ 0.03                                   | <0.0001 | -0.23 $\pm$ 0.03                                   | <0.0001 | -0.3 $\pm$ 0.03                                    | <0.0001 | -0.3 $\pm$ 0.04                                    | <0.0001 |
| Augmentation Index          | 0.04 $\pm$ 0.03                                    | 0.18    | 0.01 $\pm$ 0.03                                    | 0.67    | 0.02 $\pm$ 0.03                                    | 0.45    | 0.03 $\pm$ 0.04                                    | 0.52    |
| Characteristic Impedance    | 0.13 $\pm$ 0.03                                    | <0.0001 | 0.13 $\pm$ 0.03                                    | <0.0001 | 0.18 $\pm$ 0.03                                    | <0.0001 | 0.16 $\pm$ 0.04                                    | 0.0001  |
| Forward wave amplitude      | 0.18 $\pm$ 0.03                                    | <0.0001 | 0.2 $\pm$ 0.03                                     | <0.0001 | 0.13 $\pm$ 0.03                                    | <0.0001 | 0.13 $\pm$ 0.04                                    | 0.003   |

All variables shown were mean-centered and standardized for regression. Regression coefficients represent the change in BP measures (dependent variables) for a 1-SD higher value of the vascular stiffness measures or peak O<sub>2</sub> pulse. Models were adjusted

for age, hypertension treatment, and resting SBP and separate models were constructed for men and women. In models with peak DBP as the dependent variable, we substituted resting DBP for resting SBP as a covariate. A Bonferroni-adjusted P-value threshold of 0.01 was used to determine statistical significance.



## Major Resources Table

In order to allow validation and replication of experiments, all essential research materials listed in the Methods should be included in the Major Resources Table below. Authors are encouraged to use public repositories for protocols, data, code, and other materials and provide persistent identifiers and/or links to repositories when available. Authors may add or delete rows as needed.

### Animals (in vivo studies)

| Species | Vendor or Source | Background Strain | Sex | Persistent ID / URL |
|---------|------------------|-------------------|-----|---------------------|
| N/A     |                  |                   |     |                     |
|         |                  |                   |     |                     |
|         |                  |                   |     |                     |

### Genetically Modified Animals

|                 | Species | Vendor or Source | Background Strain | Other Information | Persistent ID / URL |
|-----------------|---------|------------------|-------------------|-------------------|---------------------|
| Parent - Male   | N/A     |                  |                   |                   |                     |
| Parent - Female |         |                  |                   |                   |                     |

### Antibodies

| Target antigen | Vendor or Source | Catalog # | Working concentration | Lot # (preferred but not required) | Persistent ID / URL |
|----------------|------------------|-----------|-----------------------|------------------------------------|---------------------|
| N/A            |                  |           |                       |                                    |                     |
|                |                  |           |                       |                                    |                     |

### DNA/cDNA Clones

| Clone Name | Sequence | Source / Repository | Persistent ID / URL |
|------------|----------|---------------------|---------------------|
| N/A        |          |                     |                     |
|            |          |                     |                     |

### Cultured Cells

| Name | Vendor or Source | Sex (F, M, or unknown) | Persistent ID / URL |
|------|------------------|------------------------|---------------------|
| N/A  |                  |                        |                     |
|      |                  |                        |                     |

### Data & Code Availability

| Description | Source / Repository | Persistent ID / URL |
|-------------|---------------------|---------------------|
| N/A         |                     |                     |
|             |                     |                     |

### Other

| Description | Source / Repository | Persistent ID / URL |
|-------------|---------------------|---------------------|
|             |                     |                     |
|             |                     |                     |

## ARRIVE GUIDELINES

The ARRIVE guidelines (<https://arriveguidelines.org/>) are a checklist of recommendations to improve the reporting of research involving animals. Key elements of the study design should be included below to better enable readers to scrutinize the research adequately, evaluate its methodological rigor, and reproduce the methods or findings.

### Study Design

| Groups             | Sex | Age | Number (prior to experiment) | Number (after termination) | Littermates (Yes/No) | Other description |
|--------------------|-----|-----|------------------------------|----------------------------|----------------------|-------------------|
| Group 1 (Control)  |     |     |                              |                            |                      |                   |
| Group 2            |     |     |                              |                            |                      |                   |
| Add more if needed |     |     |                              |                            |                      |                   |

**Sample Size:** Please explain how the sample size was decided Please provide details of any a *prior* sample size calculation, if done.

### Inclusion Criteria

### Exclusion Criteria

### Randomization

### Blinding
